# Supplementary material for: Lycopene ameliorates skin aging by regulating the insulin resistance pathway and activating SIRT1
Source: Royal Society of Chemistry journal article supplement (doi:10.1039/d2fo01111e), 2022-01-01
Supplement: d2fo01111e1.pdf [file d2fo01111e1.pdf]

**Lycopene ameliorates skin aging by regulating of the insulin resistance pathway  
and activating SIRT1**

Jing Li<sup>a,c,‡</sup>, Xin Zeng<sup>b,c,‡</sup>, Xiaolong Yang<sup>a,\*</sup> and Hong Ding<sup>c,\*</sup>

<sup>a</sup>School of Pharmaceutical Sciences, South-Central Minzu University,

Wuhan, P. R. [China](#), [yx119830915@163.com](mailto:yxl19830915@163.com), +8615223022976

<sup>b</sup>Nanchong Key Laboratory of Individualized Drug Therapy, Department of Pharmacy,

The Second Clinical Medical College of North Sichuan Medical College, Nanchong

Central Hospital, Nanchong, China

<sup>c</sup>Key Laboratory of Combinatorial Biosynthesis and Drug Discovery, Ministry of

Education, Wuhan University School of Pharmaceutical Sciences, Wuhan University,

Wuhan, 430000, Hubei, P. R. China, [dinghong1106@whu.edu.cn](mailto:dinghong1106@whu.edu.cn), +8613659870301

<sup>‡</sup>These authors contributed equally.

## Liquid chromatography

The chromatography was performed on a Thermo fisher U3000 UPLC system (Thermo Fisher Scientific, USA). A Waters Acquity UHPLC HSS T3 column (2.1 mm × 100 mm, 1.8 m) was used for sample separation with a flow rate of 0.2 mL/min and at a column temperature of 40°. The mobile phases were consisted of (A) 0.1% formic acid aqueous solution and (B) acetonitrile, and the gradient elution was optimized as follows: 0~2 min, 98% A; 2~3 min, 2~35% A; 3~17 min, 65~30% A; 17~18 min, 30% A; 18~29 min, 30%~2% A; 29~31 min, 2% A; 31~33 min, 2~98% A; 33~35 min, 98% A. The injection volume was set to 2 L. Detection wavelength was set at 360 nm.

## Mass spectrometry

Mass spectrometry analysis was performed on a Thermo Scientific™ Q Exactive hybrid quadrupole-orbitrap high resolution accurate mass spectrometer (Thermo Fisher Scientific, USA) equipped with a heated electrospray ionization (HESI) source in both positive and negative ion modes. The full scan mode range was set to 100–1500 m/z full MS and the resolution was set to 35,000. The Scan mode was Full Scan/dd-MS2; capillary temperature 320 °C; probe heater temperature 300 °C; spray voltage 3.5 kV for (-)-ESI and 2.5 kV for (+)-ESI. All the raw files were processed by Xcalibur 3.2 and Compound Discover 2.1 (CD). The compounds characterized by CD were fished by searching mz Cloud database, Chemspider and Pubchem compound.

**Figure S1** Rat model of D-gal-induced skin aging and treatment with Ly. (n = 6 per group).

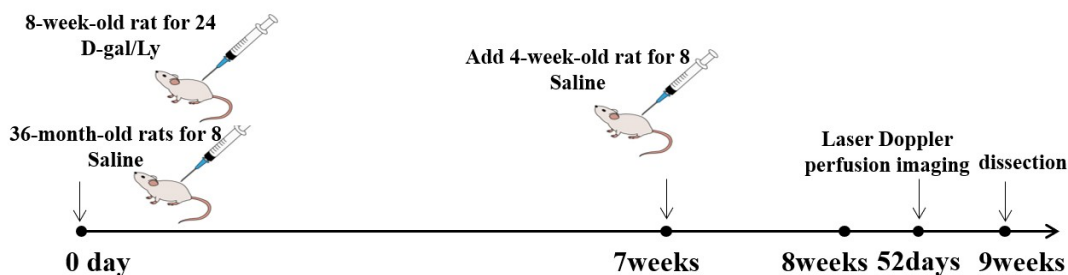

**Figure S2** OD value of different concentrations of Ly on PRSF cells. \*, # and Δ indicate that the OD values between lycopene group and control group at different

time points were significantly different,  $p < 0.05$ . (n = 6 per group).

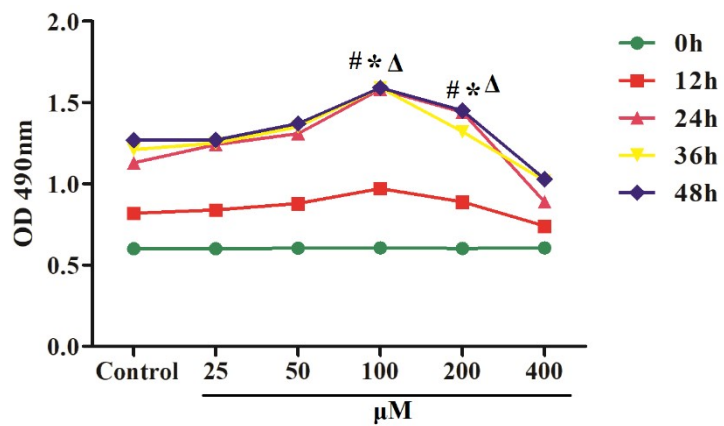

**Figure S3** PCA score plots based on LC-MS data of PRSFs. (n = 6 per group).

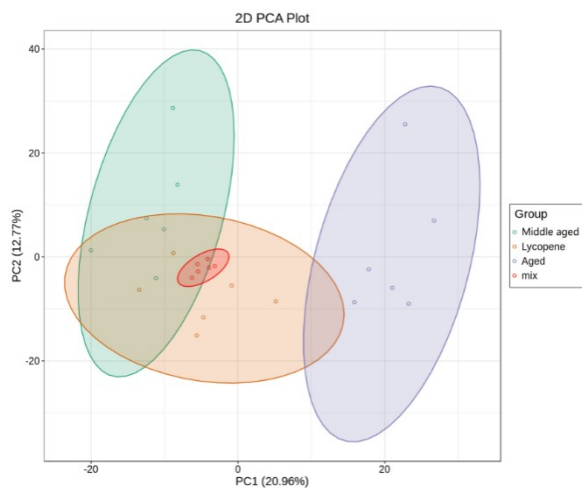

**Table S1** Differential metabolites of middle aged group and aged group. (n = 6 per group).

| <b>Index</b> | <b>Compounds</b>                                               | <b>Formula</b> | <b>VIP</b> | <b>p_value</b> | <b>Fold_Change</b> | <b>Log2FC</b> | <b>Type</b> |
|--------------|----------------------------------------------------------------|----------------|------------|----------------|--------------------|---------------|-------------|
| MW0103710    | Uridine-diphosphate-N-acetylglucosamine                        | C17H27N3O17P2  | 1.96382    | 0.00003        | 0.41054            | -1.28441      | down        |
| MEDN0204     | Pyruvic Acid                                                   | C3H4O3         | 1.99223    | 0              | 0.27524            | -1.86122      | down        |
| MW0110979    | D-erythro-N-stearoylsphingosine                                | C18H37NO2      | 1.6687     | 0.00476        | 2.02272            | 1.0163        | up          |
| MW0110759    | 2S-Amino-4E-octadecene-1,3S-diol                               | C18H37NO2      | 1.87161    | 0.00004        | 2.09012            | 1.06358       | up          |
| MEDP1617     | L-(+)-Gulose                                                   | C6H12O6        | 1.66912    | 0.0008         | 0.48674            | -1.03877      | down        |
| MEDP1592     | Cytidine 5'-Diphosphocholine                                   | C14H26N4O11P2  | 1.93809    | 0              | 2.17672            | 1.12215       | up          |
| MEDP1857     | Eicosanoyl-EA                                                  | C22H45NO2      | 1.52748    | 0.01465        | 2.42809            | 1.27982       | up          |
| MW0141815    | 1-O-Palmitoyl-2-O-acetyl-sn-glycero-3-phosphorylcholine        | C26H52NO8P     | 1.58956    | 0.00938        | 2.20579            | 1.14129       | up          |
| MW0141803    | 1-O-(cis-9-Octadecenyl)-2-O-acetyl-sn-glycero-3-phosphocholine | C28H56NO7P     | 1.69897    | 0.0008         | 0.39789            | -1.32957      | down        |
| MEDL02308    | Nicotinic Acid Adenine Dinucleotide                            | C21H27N7O14P2  | 1.7351     | 0.00428        | 2.40087            | 1.26356       | up          |
| MW0158347    | Tyr Ala Arg Asp Glu                                            | C27H40N8O11    | 1.94841    | 0              | 3.25117            | 1.70096       | up          |
| MEDL01737    | 5-Aminoimidazole ribonucleotide                                | C8H14N3O7P     | 1.7364     | 0.00104        | 2.56425            | 1.35854       | up          |
| MW0151906    | Janthitrem C                                                   | C37H47NO4      | 1.72535    | 0.0003         | 0.45522            | -1.13537      | down        |
| MW0016182    | Bexarotene                                                     | C24H28O2       | 1.70764    | 0.00319        | 5.1466             | 2.36362       | up          |
| MW0157725    | Thr Lys Gln Lys                                                | C21H41N7O7     | 1.78884    | 0.00048        | 0.46624            | -1.10086      | down        |
| MW0014872    | 5 $\alpha$ -Androstane-3,17-dione                              | C19H28O2       | 1.95925    | 0              | 0.27434            | -1.86598      | down        |
| MW0145814    | Asn Leu Pro Ala Lys                                            | C24H43N7O7     | 1.59786    | 0.00891        | 0.3118             | -1.68131      | down        |
| MW0168719    | Allopurinol; LC-ESI-QTOF; MS2; [M+H] <sup>+</sup> ; CE         | C5H4N4O        | 1.56379    | 0.00569        | 2.1183             | 1.08291       | up          |
| MW0109005    | Orlistat                                                       | C29H53NO5      | 1.73742    | 0.00361        | 0.14917            | -2.74493      | down        |
| MW0152565    | Leu Val Lys Arg                                                | C23H46N8O5     | 1.51516    | 0.0048         | 0.49612            | -1.01124      | down        |

|           |                                                                                               |             |         |         |         |          |      |
|-----------|-----------------------------------------------------------------------------------------------|-------------|---------|---------|---------|----------|------|
| MW0159691 | Chlorofluoromethane                                                                           | CH2CIF      | 1.91519 | 0.00005 | 2.51628 | 1.33129  | up   |
| MW0145598 | Argiopinin I                                                                                  | C36H63N12O6 | 1.85769 | 0.00052 | 0.1146  | -3.12534 | down |
| MW0012927 | 1-O-Hexadecyl-2-O-(4Z,7Z,10Z,13Z,16Z,19Z-<br>docosahexaenoyl)-sn-glyceryl-3-phosphorylcholine | C46H82NO7P  | 1.78269 | 0.00282 | 0.07482 | -3.74042 | down |
| MW0150432 | Gly Lys Val Lys Lys                                                                           | C25H50N8O6  | 1.64761 | 0.00338 | 0.39983 | -1.32255 | down |
| MW0007213 | Formoterol                                                                                    | C19H24N2O4  | 1.30417 | 0.03739 | 0.48697 | -1.0381  | down |
| MEDL00424 | PAz-PC                                                                                        | C33H64NO10P | 1.79232 | 0.00009 | 0.46994 | -1.08944 | down |
| MW0126582 | Spirolide D                                                                                   | C43H65NO7   | 1.26049 | 0.03599 | 0.39821 | -1.32841 | down |
| MW0107054 | Gly Asn Lys                                                                                   | C12H23N5O5  | 1.89368 | 0.00006 | 8.54349 | 3.09483  | up   |
| MW0144601 | Ala His Thr Lys                                                                               | C19H33N7O6  | 1.47463 | 0.01264 | 2.21714 | 1.1487   | up   |
| MW0110627 | 1-Palmitoyl-2-thiopalmitoyl phosphatidylcholine                                               | C40H80NO7PS | 1.97463 | 0       | 0.37495 | -1.41523 | down |

**Table S2** Differential metabolites of Ly group and aged group. (n = 6 per group).

| Index     | Compounds                                                  | Formula       | VIP     | p_value | Fold_Change | Log2FC   | Type |
|-----------|------------------------------------------------------------|---------------|---------|---------|-------------|----------|------|
| MW0103710 | Uridine-diphosphate-N-acetylglucosamine                    | C17H27N3O17P2 | 1.74826 | 0.00203 | 3.76341     | 1.91204  | up   |
| MEDN0153  | Adenosine 5'-Monophosphate                                 | C10H14N5O7P   | 1.41736 | 0.02511 | 2.27423     | 1.18538  | up   |
| MEDN0204  | Pyruvic Acid                                               | C3H4O3        | 1.98454 | 0.00000 | 3.74298     | 1.90419  | up   |
| MEDP1657  | PC(O-16:0/0:0)                                             | C24H52NO6P    | 1.44729 | 0.01348 | 2.32862     | 1.21948  | up   |
| MW0011789 | 1-(1Z-Hexadecenyl)-sn-glycero-3-phosphocholine             | C24H50NO6P    | 1.45037 | 0.02106 | 2.31413     | 1.21047  | up   |
| MW0157725 | Thr Lys Gln Lys                                            | C21H41N7O7    | 1.57029 | 0.01230 | 2.49397     | 1.31845  | up   |
| MW0145814 | Asn Leu Pro Ala Lys                                        | C24H43N7O7    | 1.60683 | 0.00651 | 3.37396     | 1.75444  | up   |
| MW0139412 | Procyanidin A2                                             | C30H24O12     | 1.68802 | 0.00312 | 0.42515     | -1.23395 | down |
| MW0139075 | N-(4-Methyl-2-oxochromen-7-yl)icosa-5,8,11,14-tetraenamide | C30H39NO3     | 1.47832 | 0.00974 | 0.49779     | -1.00639 | down |
| MW0102922 | Tributyrin                                                 | C15H26O6      | 1.85096 | 0.00012 | 0.46976     | -1.09000 | down |
| MW0145598 | Argiopinin I                                               | C36H63N12O6   | 1.36849 | 0.02345 | 2.57603     | 1.36515  | up   |
| MW0144601 | Ala His Thr Lys                                            | C19H33N7O6    | 1.54810 | 0.00530 | 0.43653     | -1.19586 | down |
| MW0109129 | Phe Pro Glu                                                | C19H25N3O6    | 1.24189 | 0.04415 | 0.40249     | -1.31298 | down |
